# Supplementary material
Source: publisher site journal article supplement (https://www.dovepress.com/article/368551)
Supplement: Supplementary file 1 [file get_supplementary_file.php]

|  | miRNA | miRNA | miRNA | miRNA | miRNA | miRNA | miRNA |
| --- | --- | --- | --- | --- | --- | --- | --- |
| 1 | miR-1 | miR-449a | miR-4515 | miR-940 | miR-590-3p | miR-299-3p | miR-3186-3p |
| 2 | miR-145* | miR-4647 | miR-4661-3p | miR-1911* | miR-302e | miR-517* | miR-653 |
| 3 | miR-145 | miR-30d | miR-140-5p | miR-33a | miR-4725-3p | miR-365* | miR-4721 |
| 4 | miR-4770 | miR-4448 | miR-323-5p | miR-3606 | miR-4529-5p | miR-3152 | miR-708* |
| 5 | miR-214 | miR-4735-3p | miR-3064-3p | miR-1909 | miR-597 | miR-4654 | miR-297 |
| 6 | miR-96 | miR-409-5p | miR-3156 | miR-3118 | miR-373* | miR-4311 | miR-1204 |
| 7 | miR-3195 | miR-4798-5p | miR-3911 | miR-4649-3p | miR-922 | miR-499-3p | miR-1471 |
| 8 | miR-30e* | miR-3973 | miR-301b | miR-379* | miR-648 | miR-548c-5p | miR-4505 |
| 9 | miR-4510 | miR-2682 | miR-4802-5p | miR-448 | miR-3614-3p | miR-886-3p | miR-598 |
| 10 | miR-144* | miR-152 | miR-4756-5p | miR-767-3p | miR-520h | miR-892a | miR-4263 |
| 11 | miR-768-3p | miR-4430 | miR-4745-3p | miR-144 | miR-4265 | miR-34b* | miR-4690-3p |
| 12 | miR-137 | miR-378e | miR-1273g | miR-3065-3p | miR-548s | miR-4704-5p | miR-1259 |
| 13 | miR-23b | miR-423-5p | miR-4660 | miR-4632 | miR-320e | miR-3154 | miR-454* |
| 14 | miR-135b | miR-4794 | miR-4793-5p | miR-3178 | miR-3612 | miR-924 | miR-1193 |
| 15 | miR-143* | miR-4503 | miR-3669 | miR-450a | miR-4748 | miR-3607-5p | miR-185 |
| 16 | let-7c | miR-4458 | miR-151-5p | miR-4300 | miR-15a* | miR-629* | miR-320a |
| 17 | miR-378i | miR-4485 | miR-4668-3p | miR-4525 | miR-545* | miR-655 | miR-3194 |
| 18 | let-7b | miR-4446-3p | miR-325 | miR-1226* | miR-3140 | miR-4326 | miR-4327 |
| 19 | miR-193a-5p | miR-585 | miR-552 | miR-576-3p | miR-191* | miR-5095 | miR-4281 |
| 20 | miR-99a | miR-141* | miR-188-3p | miR-519e | miR-4686 | miR-1273d | miR-220b |
| 21 | miR-429 | let-7e | miR-1298 | miR-323-3p | miR-499a-3p | miR-4669 | miR-4280 |
| 22 | miR-99b | miR-3978 | miR-3670 | miR-759 | miR-3157 | miR-4271 | miR-453 |
| 23 | miR-4443 | miR-1306 | miR-10a* | miR-4419b | miR-3529 | miR-4269 | miR-526b |
| 24 | miR-24-1* | miR-548ag | miR-663b | miR-4645-3p | miR-718 | miR-1274a | miR-339-3p |
| 25 | miR-143 | miR-129-3p | miR-18b | miR-4753-3p | miR-4670-5p | miR-873 | miR-596 |
| 26 | miR-574-3p | miR-376a* | miR-219-5p | miR-1202 | miR-455-5p | miR-3677 | miR-2116 |
| 27 | miR-4684-3p | miR-4798-3p | miR-556-5p | miR-1253 | miR-3616-5p | miR-320c | miR-582-3p |
| 28 | miR-490-5p | miR-3671 | miR-4536 | miR-572 | miR-3545-3p | miR-875-3p | miR-4252 |
| 29 | miR-182 | miR-548ac | miR-4500 | miR-2115 | miR-935 | miR-4715-5p | miR-340 |
| 30 | miR-214* | miR-4501 | miR-4756-3p | miR-335 | miR-4278 | miR-4509 | miR-216b |
| 31 | miR-451 | miR-376b | miR-4634 | miR-16 | miR-3686 | miR-371-5p | miR-432* |
| 32 | miR-4469 | miR-4712-3p | miR-4716-3p | miR-503 | miR-764 | miR-875-5p | miR-148a* |
| 33 | miR-133a | miR-194 | miR-4638-3p | miR-3941 | miR-27a* | miR-4745-5p | miR-3921 |
| 34 | miR-126 | miR-92b* | miR-1228 | miR-339-5p | miR-625* | miR-650 | miR-3929 |
| 35 | miR-130b | miR-96* | miR-553 | miR-4764-5p | miR-3673 | miR-3656 | miR-4325 |
| 36 | miR-125a-5p | miR-4774-5p | miR-219-1-3p | miR-98 | miR-548a-5p | miR-3667-3p | miR-146a |
| 37 | miR-4423-3p | miR-4680-3p | miR-4640-3p | miR-580 | miR-3662 | miR-658 | miR-4736 |
| 38 | miR-3653 | miR-200c* | miR-4778-5p | miR-620 | miR-885-5p | miR-3141 | miR-4502 |
| 39 | miR-125b | miR-4470 | miR-581 | miR-4713-3p | miR-624* | miR-629 | miR-1183 |
| 40 | miR-141 | miR-342-5p | miR-4771 | miR-153 | miR-4717-3p | miR-371-3p | miR-3155 |
| 41 | miR-133b | miR-181a | miR-2114 | miR-4764-3p | miR-887 | miR-4262 | miR-3654 |
| 42 | miR-199a-3p | miR-4511 | miR-4666-3p | miR-493* | miR-652 | miR-3177 | miR-570 |
| 43 | miR-30c-2* | miR-708 | miR-221 | miR-139-3p | miR-770-5p | miR-3160 | miR-1284 |
| 44 | miR-140-3p | miR-374a | miR-92b | miR-199b-5p | miR-1258 | miR-380* | miR-302d |
| 45 | miR-100 | miR-20a | miR-4757-5p | miR-4759 | miR-605 | miR-1305 | miR-485-3p |
| 46 | miR-363 | miR-567 | miR-568 | miR-4688 | miR-4701-5p | miR-4699-3p | miR-4716-5p |
| 47 | miR-200a | miR-505* | miR-524-5p | miR-1286 | miR-4291 | miR-3134 | miR-150* |
| 48 | miR-203 | miR-1245b-5p | miR-4703-3p | miR-4664-5p | miR-425 | miR-4767 | miR-4733-5p |
| 49 | miR-9 | miR-497 | miR-4527 | miR-1245b-3p | miR-298 | miR-4714-3p | miR-1205 |
| 50 | miR-204 | miR-4729 | miR-603 | miR-433 | miR-220c | miR-891a | let-7a* |
| 51 | miR-1979 | miR-4752 | miR-4528 | miR-4310 | miR-512-3p | miR-4723-3p | miR-4294 |
| 52 | miR-365 | miR-181c* | miR-105* | miR-4530 | miR-3676 | miR-4636 | miR-548v |
| 53 | miR-4524* | miR-342-3p | miR-4638-5p | miR-3615 | miR-3617 | miR-3202 | miR-523 |
| 54 | miR-378* | miR-4476 | miR-193a-3p | miR-4653-3p | miR-590-5p | miR-128 | miR-4532 |
| 55 | miR-28-5p | miR-3613-5p | miR-4483 | miR-587 | miR-3168 | miR-3130-5p | miR-3683 |
| 56 | miR-4526 | miR-513a-5p | miR-4652-5p | miR-4792 | miR-346 | miR-4804-3p | miR-29a |
| 57 | let-7d | miR-4804-5p | miR-3064-5p | miR-659 | miR-4787-3p | miR-3192 | miR-4423-5p |
| 58 | miR-183 | miR-296-3p | miR-551a | miR-4802-3p | miR-671-3p | miR-541* | miR-3126-5p |
| 59 | miR-193b | miR-1269 | miR-4426 | miR-3201 | miR-1292 | miR-4734 | miR-549 |
| 60 | miR-151b | miR-520c-3p | miR-29c | miR-500* | miR-4442 | miR-4507 | miR-4722-5p |
| 61 | miR-27b | miR-378h | miR-564 | miR-2116* | miR-548w | miR-324-3p | miR-1978 |
| 62 | let-7d* | miR-4709-3p | miR-504 | miR-4735-5p | miR-4738-3p | miR-196a* | miR-1282 |
| 63 | miR-199b-3p | miR-34a* | miR-4781-3p | miR-105 | miR-323b-3p | miR-1226 | miR-187* |
| 64 | miR-1974 | miR-29b | miR-3199 | miR-1294 | miR-569 | miR-3920 | miR-3149 |
| 65 | miR-4635 | miR-135a | miR-4289 | miR-4540 | miR-3120 | miR-138-2* | miR-495 |
| 66 | miR-1290 | miR-30e | miR-3910 | miR-4301 | miR-518d-3p | miR-4288 | miR-3187 |
| 67 | miR-3135b | miR-4768-3p | miR-2682* | miR-136* | miR-609 | miR-224* | miR-3689a-3p |
| 68 | miR-592 | miR-106a* | miR-802 | miR-3611 | miR-3146 | miR-1184 | miR-15b* |
| 69 | miR-3972 | miR-106b | miR-95 | miR-3179 | miR-4690-5p | miR-886-5p | miR-1275 |
| 70 | miR-490-3p | miR-532-5p | miR-3190-3p | miR-3664 | miR-1201 | miR-31* | miR-4778-3p |
| 71 | miR-150 | miR-4728-5p | miR-517b | miR-320b | miR-548a-3p | miR-4797-5p | miR-4455 |
| 72 | miR-370 | miR-4795-5p | miR-3913 | miR-521 | miR-3646 | miR-1238 | miR-1237 |
| 73 | miR-30d* | miR-4773 | miR-425* | miR-1308 | miR-376c | miR-4746-3p | miR-632 |
| 74 | miR-218 | miR-4672 | miR-4490 | miR-943 | miR-4312 | miR-938 | miR-548i |
| 75 | miR-328 | miR-635 | miR-548f | miR-3144-5p | miR-4492 | miR-181a* | miR-302c |
| 76 | miR-23a | miR-627 | miR-382 | miR-4429 | miR-892b | miR-613 | miR-4259 |
| 77 | miR-197 | miR-4691-3p | miR-4639-3p | miR-4534 | miR-4640-5p | miR-548h | miR-519c-5p |
| 78 | let-7g | miR-374a* | miR-636 | miR-3652 | miR-589* | miR-205 | miR-4274 |
| 79 | miR-139-5p | miR-135b* | miR-17 | miR-4666-5p | miR-4418 | miR-450b-5p | miR-3924 |
| 80 | miR-4790-5p | miR-29c* | let-7a-2* | miR-501-5p | miR-1976 | miR-1249 | miR-217 |
| 81 | miR-378d | miR-23a* | miR-3171 | miR-744 | miR-3127 | miR-4314 | miR-595 |
| 82 | miR-4668-5p | miR-4497 | miR-4457 | miR-3186-5p | miR-3197 | miR-27a | miR-557 |
| 83 | miR-29b-2* | miR-199a-5p | miR-514b-5p | miR-103-2* | miR-296-5p | miR-891b | miR-3909 |
| 84 | miR-4799-5p | miR-3158 | miR-24 | miR-1208 | miR-449c* | miR-1264 | miR-4267 |
| 85 | miR-7 | miR-4436b-3p | miR-4727-3p | miR-507 | miR-1287 | miR-3150 | miR-4465 |
| 86 | miR-374b | miR-4677-5p | miR-218-2* | miR-4692 | miR-4328 | miR-4518 | miR-223 |
| 87 | miR-4421 | miR-4704-3p | miR-1343 | miR-1250 | miR-616 | miR-15a | miR-888 |
| 88 | miR-181c | miR-4684-5p | miR-761 | miR-633 | miR-3605-3p | miR-4664-3p | miR-548u |
| 89 | miR-4464 | miR-4709-5p | miR-518a-3p | miR-4662a-5p | miR-106b* | miR-361-3p | miR-4268 |
| 90 | miR-4422 | miR-4693-5p | miR-2681 | miR-34c-5p | miR-579 | miR-372 | miR-933 |
| 91 | miR-26a-2* | miR-29b-1* | miR-15b | miR-3647-3p | miR-4726-3p | miR-611 | miR-129-5p |
| 92 | miR-487b | miR-19b | miR-4303 | miR-4797-3p | miR-4657 | miR-424* | miR-25* |
| 93 | miR-4445* | miR-132 | miR-4463 | miR-1295 | miR-1912 | miR-513c | miR-4768-5p |
| 94 | miR-195 | miR-208a | miR-499a-5p | miR-4780 | miR-4315 | miR-4655-5p | miR-2052 |
| 95 | miR-548ai | miR-4694-3p | miR-4683 | miR-548t | miR-369-5p | miR-3193 | miR-3943 |
| 96 | miR-193b* | miR-578 | miR-939 | miR-604 | miR-302d* | miR-3605-5p | miR-1587 |
| 97 | miR-9* | miR-500 | miR-497* | miR-367 | miR-3188 | miR-1293 | miR-4744 |
| 98 | miR-3687 | miR-208b | miR-4646-3p | miR-4783-3p | miR-4665-3p | miR-3684 | miR-125a-3p |
| 99 | miR-4644 | miR-4521 | miR-4479 | miR-181a-2* | miR-4711-3p | miR-3129 | miR-1207-5p |
| 100 | miR-1826 | miR-4677-3p | miR-4329 | miR-4523 | miR-1270 | miR-3619-5p | miR-874 |
| 101 | miR-26a | miR-4460 | miR-4481 | miR-488* | miR-329 | miR-32* | miR-1257 |
| 102 | miR-378f | miR-4318 | miR-551b* | miR-3657 | miR-3607-3p | miR-576-5p | miR-3675-5p |
| 103 | miR-4701-3p | miR-196a | miR-4667-5p | miR-4724-5p | miR-4279 | miR-3689b* | miR-219-2-3p |
| 104 | miR-494 | miR-340* | miR-4790-3p | miR-584 | miR-202 | miR-1245 | miR-5096 |
| 105 | miR-4487 | miR-3180 | miR-23c | miR-3622b-3p | miR-4761-3p | miR-3907 | miR-1324 |
| 106 | miR-4524 | miR-299-5p | miR-593 | miR-1281 | miR-186 | miR-520a-3p | miR-1280 |
| 107 | miR-4489 | miR-4461 | miR-548b-3p | miR-4656 | miR-4685-5p | miR-4330 | miR-18b* |
| 108 | miR-10b | miR-383 | miR-2392 | miR-4705 | miR-4516 | miR-4740-5p | miR-300 |
| 109 | miR-129* | miR-4535 | miR-4755-3p | miR-2115* | miR-888* | miR-19b-1* | miR-1273f |
| 110 | miR-4451 | miR-4431 | miR-4693-3p | miR-4747-5p | miR-3200 | miR-25 | miR-3620 |
| 111 | miR-628-3p | miR-423-3p | miR-122* | miR-223* | miR-3618 | miR-1276 | miR-937 |
| 112 | miR-4699-5p | miR-517a | miR-548aj | miR-3655 | miR-19b-2* | miR-767-5p | miR-32 |
| 113 | miR-338-3p | miR-4520a-3p | miR-558 | miR-1279 | miR-4277 | miR-524-3p | miR-4788 |
| 114 | miR-4741 | miR-4447 | miR-4733-3p | miR-4719 | miR-4287 | miR-4305 | miR-645 |
| 115 | miR-4434 | miR-4730 | miR-626 | miR-614 | miR-4784 | miR-646 | miR-518d-5p |
| 116 | miR-548x | miR-509-3-5p | let-7e* | miR-615-3p | miR-3137 | miR-520f | miR-586 |
| 117 | miR-30a | miR-374b* | miR-942 | miR-20a* | miR-3132 | miR-483-5p | miR-4266 |
| 118 | miR-4662b | miR-4425 | miR-377 | miR-455-3p | miR-1185 | miR-516a-3p | miR-3927 |
| 119 | miR-224 | miR-4775 | miR-4449 | miR-485-5p | miR-1261 | miR-3689f | miR-638 |
| 120 | miR-4477b | miR-1283 | miR-3681 | miR-326 | miR-3180-5p | miR-3940 | miR-30b* |
| 121 | miR-130a | miR-4432 | miR-1323 | miR-3121 | miR-671-5p | let-7b* | miR-4776-5p |
| 122 | miR-19a | miR-3668 | miR-612 | miR-4715-3p | miR-525-5p | miR-3135 | miR-4323 |
| 123 | miR-422a | miR-639 | miR-4264 | miR-4697-3p | miR-378b | miR-3176 | miR-1236 |
| 124 | miR-4703-5p | miR-562 | miR-1973 | miR-146b-5p | miR-216a | miR-3182 | miR-3660 |
| 125 | miR-320d | miR-3977 | miR-4520b-3p | miR-621 | miR-302b | miR-487a | miR-3616-3p |
| 126 | miR-4513 | miR-675 | miR-3136 | miR-4777-3p | miR-3131 | miR-29a* | miR-4689 |
| 127 | miR-4781-5p | miR-20b* | miR-181b | miR-4270 | miR-941 | miR-103 | miR-4755-5p |
| 128 | miR-4537 | miR-4674 | miR-4520a-5p | miR-643 | miR-3609 | miR-99a* | miR-1229 |
| 129 | miR-378g | let-7a | miR-519b-5p | miR-16-1* | miR-3545-5p | miR-3692 | miR-3143 |
| 130 | miR-548ah | miR-4471 | miR-493 | miR-877* | miR-30c-1* | miR-516b | miR-3147 |
| 131 | miR-3196 | miR-4749-3p | miR-3663-3p | let-7f-1* | miR-647 | miR-4785 | miR-2114* |
| 132 | miR-4468 | miR-1972 | miR-200c | miR-4680-5p | miR-138 | miR-7-1* | miR-3139 |
| 133 | miR-22* | miR-148a | miR-375 | miR-1180 | miR-577 | miR-3181 | miR-657 |
| 134 | miR-3689d | miR-4724-3p | miR-222 | miR-548l | miR-519c-3p | miR-1909* | miR-4436b-5p |
| 135 | miR-4796-3p | miR-4695-5p | miR-522 | miR-125b-1* | miR-21* | miR-575 | miR-4313 |
| 136 | miR-4438 | miR-4760-5p | miR-371b-5p | miR-1910 | miR-3125 | miR-1207-3p | miR-138-1* |
| 137 | miR-26b | miR-4774-3p | miR-1271 | miR-211 | miR-518f | miR-548d-3p | miR-518b |
| 138 | miR-4473 | miR-4504 | miR-4306 | miR-548g | miR-4320 | miR-4290 | miR-34b |
| 139 | let-7i* | miR-4512 | miR-582-5p | miR-518f* | miR-431* | miR-3161 | miR-1977 |
| 140 | miR-548ad | miR-4706 | miR-454 | miR-4456 | miR-221* | miR-599 | miR-3925 |
| 141 | miR-149 | miR-4796-5p | miR-4742-3p | miR-146a* | miR-890 | miR-543 | miR-1260b |
| 142 | miR-4633-3p | miR-367* | miR-4427 | miR-1908 | miR-4444 | miR-3935 | miR-3148 |
| 143 | miR-1231 | miR-337-5p | miR-4681 | miR-885-3p | miR-411* | miR-4725-5p | miR-656 |
| 144 | miR-27b* | miR-362-5p | miR-4782-5p | miR-92a-1* | miR-3153 | miR-4707-5p | miR-3116 |
| 145 | miR-563 | miR-548an | miR-381 | miR-373 | miR-640 | miR-1182 | miR-191 |
| 146 | miR-4645-5p | miR-4799-3p | miR-362-3p | miR-758 | miR-665 | miR-3613-3p | miR-515-5p |
| 147 | miR-1914 | miR-4742-5p | miR-4754 | miR-26b* | miR-412 | miR-4685-3p | miR-4695-3p |
| 148 | miR-664 | miR-4697-5p | miR-192* | miR-149* | miR-1274b | miR-3191 | miR-3679-3p |
| 149 | miR-4662a-3p | miR-4436a | miR-449c | miR-4738-5p | miR-125b-2* | miR-4299 | miR-1291 |
| 150 | miR-4439 | miR-4531 | miR-516a-5p | miR-4309 | miR-4708-5p | miR-4285 | miR-1469 |
| 151 | miR-10a | miR-4486 | miR-200b* | miR-26a-1* | miR-136 | miR-4678 | miR-508-5p |
| 152 | miR-1246 | miR-548ae | miR-484 | miR-642 | miR-4324 | miR-1278 | miR-602 |
| 153 | miR-4746-5p | miR-4732-5p | miR-1252 | miR-625 | miR-1537 | miR-3936 | miR-548d-5p |
| 154 | miR-1302 | miR-1262 | miR-431 | miR-3622a-5p | miR-502-3p | miR-2467-3p | miR-3164 |
| 155 | miR-30c | miR-593* | miR-4795-3p | miR-4743 | miR-3133 | miR-4763-3p | miR-92a |
| 156 | miR-4533 | miR-186* | miR-4723-5p | miR-135a* | miR-3162 | miR-99b* | miR-101 |
| 157 | miR-548al | miR-4710 | miR-4477a | miR-3690 | miR-4304 | miR-514 | miR-520d-3p |
| 158 | miR-142-3p | miR-762 | miR-127-3p | miR-544 | miR-4707-3p | miR-148b | miR-3144-3p |
| 159 | miR-4717-5p | miR-520g | miR-33a* | miR-34c-3p | miR-3128 | miR-301a | miR-608 |
| 160 | miR-4475 | miR-515-3p | miR-3944 | miR-4783-5p | miR-489 | miR-106a | miR-3174 |
| 161 | miR-574-5p | miR-4539 | miR-1206 | miR-541 | miR-2110 | miR-187 | miR-4761-5p |
| 162 | miR-18a | miR-23b* | miR-4720-5p | miR-3691 | miR-4766-5p | miR-3169 | miR-744* |
| 163 | miR-4484 | miR-4454 | miR-4747-3p | miR-1225-3p | miR-4713-5p | miR-122 | miR-130b* |
| 164 | miR-4659b-3p | miR-4293 | miR-4646-5p | miR-554 | miR-4514 | miR-4758-5p | miR-513b |
| 165 | miR-548ak | miR-24-2* | miR-324-5p | miR-769-3p | miR-4760-3p | miR-184 | miR-483-3p |
| 166 | miR-498 | miR-566 | miR-4749-5p | miR-192 | miR-1825 | miR-409-3p | miR-4661-5p |
| 167 | miR-331-3p | miR-4782-3p | miR-4731-3p | miR-4751 | miR-3714 | miR-369-3p | miR-616* |
| 168 | miR-4480 | miR-1268 | miR-411 | miR-124 | miR-3659 | miR-1234 | miR-3658 |
| 169 | miR-548ab | miR-4466 | miR-2277 | miR-4708-3p | miR-124* | miR-548p | miR-548j |
| 170 | let-7i | miR-4777-5p | miR-4639-5p | miR-1256 | miR-1296 | miR-338-5p | miR-449b |
| 171 | miR-101* | miR-4648 | miR-4658 | miR-548m | miR-3165 | miR-222* | miR-1260 |
| 172 | miR-132* | miR-676* | miR-606 | miR-3649 | miR-1915 | miR-3123 | miR-3648 |
| 173 | miR-548n | miR-4506 | miR-769-5p | miR-556-3p | miR-4322 | miR-525-3p | miR-194* |
| 174 | miR-548am | miR-876-3p | miR-4791 | miR-432 | miR-3681* | miR-93 | miR-1468 |
| 175 | miR-4474-3p | miR-202* | miR-28-3p | miR-200b | miR-4727-5p | miR-1297 | miR-4659a-3p |
| 176 | miR-21 | miR-4696 | miR-4803 | miR-410 | miR-651 | miR-4296 | miR-660 |
| 177 | miR-4643 | miR-4793-3p | miR-3065-5p | miR-1288 | miR-100* | miR-182* | miR-548k |
| 178 | miR-3122 | miR-1244 | miR-4676-5p | miR-3919 | miR-20b | miR-1299 | miR-1227 |
| 179 | miR-4424 | miR-4772-3p | miR-4769-5p | miR-1269b | miR-92a-2* | miR-654-5p | miR-518c* |
| 180 | miR-421 | miR-520b | miR-1266 | miR-190 | miR-496 | miR-1913 | miR-3166 |
| 181 | miR-4417 | miR-3175 | miR-302a* | miR-889 | miR-3926 | miR-452* | miR-4254 |
| 182 | miR-3172 | miR-4499 | miR-876-5p | miR-591 | miR-526b* | let-7f-2* | miR-3622b-5p |
| 183 | miR-4482 | miR-4467 | miR-93* | miR-148b* | miR-508-3p | miR-380 | miR-1233 |
| 184 | miR-4433 | miR-331-5p | miR-923 | miR-335* | miR-934 | miR-4257 | miR-4251 |
| 185 | miR-3916 | miR-4419a | miR-31 | miR-877 | miR-4316 | miR-4653-5p | miR-3942 |
| 186 | miR-4663 | let-7f | miR-4488 | miR-511 | miR-544b | miR-22 | miR-3610 |
| 187 | miR-4718 | miR-215 | miR-3145 | miR-1273c | miR-488 | miR-134 | miR-4508 |
| 188 | miR-4687-5p | miR-4649-5p | miR-4691-5p | miR-2054 | miR-501-3p | miR-4283 | miR-1178 |
| 189 | miR-451b | miR-4772-5p | miR-107 | miR-1303 | miR-518e | miR-3674 | miR-630 |
| 190 | miR-1181 | miR-4493 | miR-379 | miR-1265 | miR-4712-5p | miR-1915* | miR-185* |
| 191 | miR-4687-3p | miR-4671-5p | miR-548x | miR-675* | miR-1289 | miR-183* | miR-520c-5p |
| 192 | miR-5047 | miR-196b | miR-4676-3p | miR-4286 | miR-4652-3p | miR-220a | miR-212 |
| 193 | miR-1247 | miR-30b | miR-519b-3p | miR-3167 | miR-127-5p | miR-154 | miR-512-5p |
| 194 | miR-517c | miR-4737 | miR-520e | miR-7-2* | miR-491-5p | miR-449b* | miR-1255b |
| 195 | miR-520d-5p | miR-4801 | miR-519a | miR-561 | miR-4655-3p | miR-3688 | miR-4800-3p |
| 196 | miR-3651 | miR-4739 | miR-4650-3p | miR-936 | miR-147 | miR-4714-5p | miR-3667-5p |
| 197 | miR-30a* | miR-491-3p | miR-548y | miR-2861 | miR-4302 | miR-510 | miR-4307 |
| 198 | miR-4776-3p | miR-4675 | miR-622 | miR-663 | miR-1197 | miR-1273 | miR-4763-5p |
| 199 | miR-4474-5p | miR-1224-3p | miR-2467-5p | miR-4671-3p | miR-4757-3p | miR-4295 | miR-330-3p |
| 200 | miR-4459 | miR-4779 | miR-610 | miR-4321 | miR-3938 | miR-3928 | miR-3119 |
| 201 | miR-4637 | miR-10b* | miR-3183 | miR-376a | miR-361-5p | miR-1267 | miR-1224-5p |
| 202 | miR-345 | miR-3908 | miR-661 | miR-4673 | miR-146b-3p | miR-337-3p | miR-302c* |
| 203 | miR-4478 | miR-4720-3p | miR-519e* | miR-3665 | miR-452 | miR-4253 | miR-944 |
| 204 | miR-486-3p | miR-371b-3p | miR-4420 | miR-4740-3p | miR-3170 | miR-3189 | miR-3115 |
| 205 | miR-4441 | miR-520a-5p | miR-545 | miR-676 | miR-1538 | miR-1827 | miR-4732-3p |
| 206 | miR-4491 | miR-628-5p | miR-34a | miR-206 | miR-3159 | miR-130a* | miR-3675-3p |
| 207 | miR-4462 | miR-1322 | miR-4728-3p | miR-3621 | miR-155 | miR-571 | miR-1179 |
| 208 | miR-210 | miR-539 | miR-641 | miR-16-2* | miR-513a-3p | miR-302a | miR-154* |
| 209 | miR-1975 | miR-4651 | miR-4800-5p | has-miR-16 | miR-4440 | miR-190b | miR-3922 |
| 210 | miR-4753-5p | miR-768-5p | miR-615-5p | miR-4538 | miR-4261 | let-7c* | miR-363* |
| 211 | miR-3117 | miR-588 | miR-3647-5p | miR-330-5p | miR-4694-5p | miR-3923 | miR-4786-5p |
| 212 | miR-4495 | miR-1255a | miR-505 | miR-1321 | miR-151-3p | miR-4308 | miR-624 |
| 213 | miR-142-5p | miR-4787-5p | miR-4722-3p | miR-509-3p | miR-1228* | miR-4766-3p | miR-3622a-3p |
| 214 | miR-3689a-5p | miR-1307 | miR-551b | miR-664* | miR-188-5p | miR-4641 | miR-3591-3p |
| 215 | miR-4789-3p | miR-4642 | miR-4786-3p | miR-377* | miR-3685 | miR-589 | miR-1301 |
| 216 | miR-19a* | miR-4665-5p | miR-4435 | miR-548e | miR-766 | miR-378c | miR-518c |
| 217 | miR-3688-5p | miR-1268b | miR-654-3p | miR-506 | miR-1277 | miR-4762-5p | miR-618 |
| 218 | miR-4679 | miR-4711-5p | miR-4522 | miR-4453 | miR-17* | miR-424 | miR-499-5p |
| 219 | miR-4472 | miR-3672 | miR-548q | miR-3190-5p | miR-3682 | miR-542-5p | miR-218-1* |
| 220 | miR-4437 | miR-3591-5p | miR-760 | miR-4682 | miR-302f | miR-623 | miR-668 |
| 221 | miR-4317 | miR-4297 | miR-526a | miR-181d | miR-3713 | miR-550* | miR-3163 |
